# Supplementary material
Source: ML conference proceedings conference paper supplement (https://aclanthology.org/2026.americasnlp-6.21)

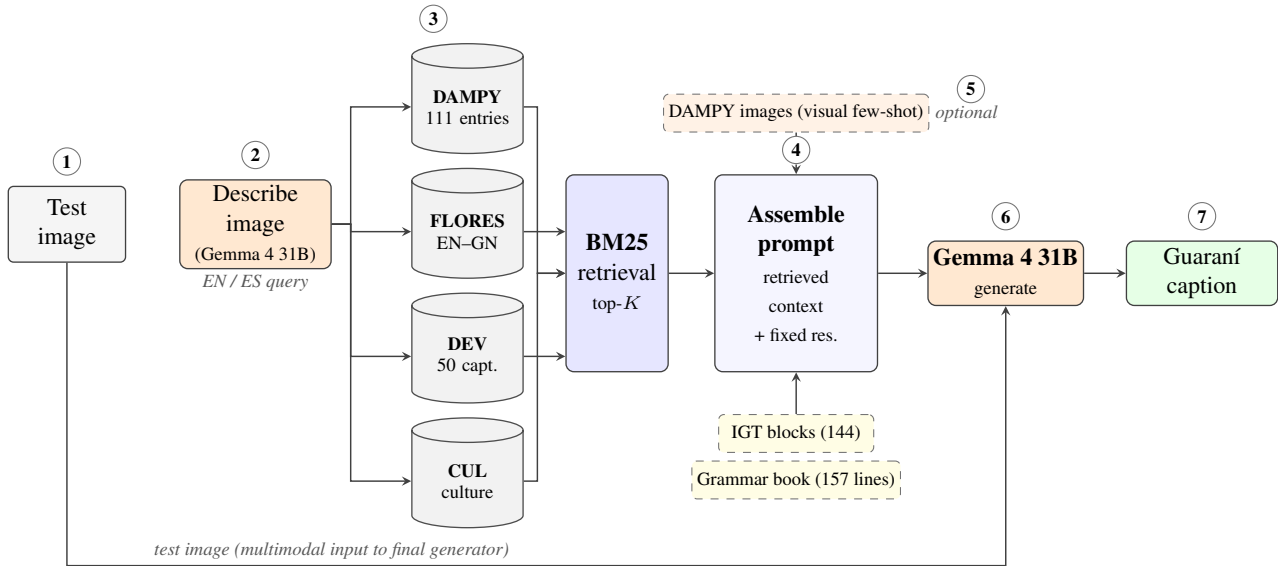

Supplement: SupplementaryMaterial [file figure1_preview.pdf › AmericasNLPSourceSubmissionFile/figure1_preview.pdf]
